# Supplementary material for: Assessment of Albumin Usage Patterns and Appropriateness in a Comprehensive Cancer Centre: A retrospective study in Jordan
Source: PubMed Central journal article supplement (PMC11370948; doi:10.18295/squmj.8.2024.049), 2024-08-29
Supplement: SQUMJ2408-354-359_Supplementary.pdf [file SQUMJ2408-354-359_Supplementary.pdf]

1 **Supplementary Table 1:** Summary of the approved indications and dosing implied in this  
 2 study<sup>1,3,13,14</sup>

| <b>Indication</b>                                    | <b>Notes</b>                                                                                                                                                                                                                    | <b>Dose</b>                                                                |
|------------------------------------------------------|---------------------------------------------------------------------------------------------------------------------------------------------------------------------------------------------------------------------------------|----------------------------------------------------------------------------|
| Paracentesis                                         | Appropriate if clearly documented in the patient's electronic medical record.                                                                                                                                                   | 5 to 10 g for every liter removed or 50 g total for paracentesis >5 L.     |
| Therapeutic plasmapheresis                           | For exchanges of > 20 mL/kg in one session or > 20 mL/kg/week in more than one session.<br>Volume replacement as indicated in the patient's medication record.                                                                  | Titrate dose to plasma volume removed during procedure.                    |
| Spontaneous bacterial peritonitis (SBP)              | In association with antibiotics.<br>Appropriate if clearly documented in the patient's electronic medical record.                                                                                                               | Initial: 1.5 g/kg within 6 hours of diagnosis, followed by 1 g/kg on day 3 |
| Major surgery                                        | Major surgery defined as (> 40% resection of the liver, extensive intestinal resection) when the serum albumin is < 2 g/dL.                                                                                                     | 25 g continued until albumin is > 2.5, for up to 4 days.                   |
| Cirrhosis of the liver with refractory ascites       | Ascites not responsive to diuretics (especially in those with hypovolemia that fails to respond to diuretics, as written in the patient's medical record).                                                                      | 1 g/kg (maximum 100 g) for 2 days.                                         |
| Contraindications to the use of non-protein colloids | Acute liver failure (ALF) will be assessed through physician notes, INR through electronic labs.                                                                                                                                | 25 g continued until albumin is > 2.5, for up to 4 days                    |
|                                                      | Moderate-severe renal failure; absolute increase in the SCr concentration of 0.3 mg/dL or greater, a relative increase to 1.5- to 2-fold above baseline <u>CKD (chronic kidney disease)</u> : as written in the medical records | 25 g to be repeated as needed.                                             |
|                                                      | During dialysis treatment in the presence of severe abnormalities of hemostasis and baseline albumin < 2 – 2.5 g/dL as indicated in the patient's medical record (dialysis note).                                               | 25 g to be repeated as needed.                                             |
|                                                      | Recent intracranial hemorrhage (within the first week after brain trauma).<br>Per physician notes.                                                                                                                              | 0.5-2 g/day                                                                |

|                         |                                                                                                                                                                                                                                                           |                                                        |
|-------------------------|-----------------------------------------------------------------------------------------------------------------------------------------------------------------------------------------------------------------------------------------------------------|--------------------------------------------------------|
| Acute Hemorrhagic shock | <p>Only in the case of :<br/>Lack of response to crystalloids or colloids; crystalloids (4 L) have failed to produce a response within 2 h for adult patients.<br/>Contraindication to the use of non-protein colloids.<br/>For up to 48 hours.</p>       | 0.5 g/kg to be repeated as needed.                     |
| Hepato-renal syndrome   | <p>In association with vasoconstricting drugs.<br/>Appropriate if clearly documented in the patient's electronic medical record.</p>                                                                                                                      | 25-50 g daily for 72 hours.                            |
| Nephrotic syndrome      | <p>Only in patients with albumin &lt; 2 g/dL with marked hypovolemia and/or acute pulmonary edema (as determined by physician in notes) and/or acute renal failure.</p>                                                                                   | 25 g in combination with diuretics.                    |
| ARDS                    | <p>Mechanically ventilated patients with acute lung injury/acute respiratory distress syndrome, whose serum total protein concentrations were &lt;6.0 g/dL were included.<br/>Determined by physician documentation in the electronic medical record.</p> | 25 g over 30 minutes repeat every 8 hours for 3 days.  |
| Septic shock            | <p>Albumin in the fluid resuscitation of sepsis and septic shock when patients require a substantial amount of crystalloids (30 mL/kg) within the first three hours.<br/>The indication is considered approved if written in the physicians' note.</p>    | 12.5 to 25 g; repeat after 15 to 30 minutes as needed. |
